# Supplementary material
Source: ML conference proceedings conference paper supplement (https://openreview.net/forum?id=H25xduunIK)
Supplement: supplementary_material [file attachment]

# Report Card for Claude 3.5 Sonnet on MATH

## Algebra

- **Mastery of Quadratic Functions and Equations:** It demonstrates exceptional proficiency in handling quadratic functions and equations. It consistently applies a variety of techniques, including factoring, completing the square, and the quadratic formula, to solve complex problems. Its solutions for problems involving parabolas are methodical and accurate. It exhibits a strong understanding of the relationships between quadratic functions and their graphs, successfully solving quadratic inequalities. It skillfully applies the difference of squares formula and recognizes quadratic patterns in advanced problems. Its ability to determine key points of quadratic functions and understand how changes in coefficients affect the graph is noteworthy. However, it occasionally makes errors in complex problem-solving, such as miscalculating the number of integer solutions in one instance.
- **Understanding of Functions and Their Properties:** It displays a comprehensive grasp of function properties across various types, including circles, hyperbolas, parabolas, and rational functions. It accurately applies the equations of these functions and understands their geometric implications. Its proficiency extends to analyzing function characteristics such as domain and range, and effectively working with composite and inverse functions. It shows a solid understanding of function transformations and their effects on graphs, correctly interpreting how changes to a function affect its graph and reversing these transformations to solve problems. While it demonstrates strong skills overall, it made a minor error in counting lattice points for a circle problem. Its ability to handle complex function problems, including those involving absolute values, is commendable. However, its explanations could be more concise and focused.
- **Ability to Model and Solve Word Problems Using Algebra:** It excels at translating complex word problems into algebraic expressions and equations. It consistently demonstrates a systematic approach to problem-solving, breaking down complex scenarios into manageable steps. Its explanations are clear, logically structured, and demonstrate a good understanding of the underlying concepts. It shows particular strength in geometric and financial modeling problems, setting up appropriate equations and solving them with precision. Its ability to apply algebraic concepts to various real-world scenarios, including optimization problems, is impressive.
- **Coordinate Geometry and Graphing Skills:** It displays strong skills in coordinate geometry, particularly when dealing with circles, parabolas, and hyperbolas. It effectively uses the properties of these shapes to solve problems involving lattice points and specific coordinates. It competently applies the distance formula, midpoint formula, and understands the relationship between algebraic equations and geometric representations. Its ability to integrate algebraic concepts with geometric problems is noteworthy.
- **Optimization and Applied Mathematics:** It shows proficiency in optimization problems, correctly applying calculus principles to find maximum or minimum values in practical scenarios. Its approach to the bookstore pricing problem was particularly well-executed.

It demonstrates the ability to apply mathematical concepts to real-world situations effectively.

- **Knowledge and Application of Sequences and Series:** It demonstrates proficiency in working with arithmetic and geometric sequences and series. It correctly applies formulas for sums of series and understands the conditions for convergence of infinite geometric series. It accurately identifies patterns and solves problems involving both arithmetic and geometric sequences. Its ability to recognize and work with geometric series in complex problems is particularly strong.
- **Problem-Solving Strategy and Logical Reasoning:** It exhibits a strong, methodical approach to problem-solving. It consistently breaks down complex problems into manageable steps, shows clear reasoning in each step, and verifies solutions when appropriate. It demonstrates the ability to think critically and apply algebraic concepts to various scenarios. Its systematic approach and logical reasoning skills are evident across all areas of algebra.
- **Proficiency in Solving Linear Equations and Inequalities:** It demonstrates strong proficiency in solving linear equations and inequalities. It correctly sets up and solves complex linear problems, showing a clear understanding of algebraic manipulation techniques. It confidently applies these skills to equations involving fractions and radicals, displaying a strong ability to isolate variables and simplify expressions.
- **Proficiency in Complex Number Operations:** It demonstrates strong skills in working with complex numbers and imaginary units. It confidently manipulates expressions involving  $i$  and correctly applies the cyclic properties of powers of  $i$  to simplify complex expressions. Its ability to handle complex number operations is well-developed.
- **Understanding of Absolute Value and its Applications:** It shows a clear grasp of absolute value concepts and their applications in functions. It correctly interprets and manipulates expressions involving absolute values, demonstrating understanding of their impact on function behavior and ranges. It accurately identifies the conditions for different cases and rewrites expressions without absolute value signs. Its ability to work with absolute value in various contexts is commendable.
- **Proficiency in Manipulating Algebraic Expressions:** It demonstrates exceptional skill in manipulating complex algebraic expressions, including those involving radicals and fractions. It confidently applies algebraic techniques such as factoring, rationalizing denominators, and simplifying expressions. Its ability to handle sophisticated algebraic manipulations is highly developed.
- **Understanding of Exponential and Logarithmic Functions:** It shows competence in working with exponential expressions, particularly in the context of compound interest problems. It accurately applies exponential growth formulas and understands their real-world applications. Its ability to handle exponential and logarithmic functions in practical scenarios is noteworthy.
- **Ability to Solve Systems of Equations:** It shows competence in solving systems of equations, particularly those involving quadratic and linear equations. It can effectively use substitution and comparison methods to find points of intersection.
- **Application of Mathematical Principles to Physics Concepts:** It successfully applies algebraic concepts to physics problems, demonstrating an ability to interpret and use

mathematical relationships in scientific contexts. It shows a good understanding of how changes in one variable affect others in physical systems.
